# Supplementary material for: Association of Body Mass Index with Risk of Major Adverse Cardiovascular Events and Mortality in People with Diabetes
Source: PubMed Central journal article supplement — J Obes Metab Syndr. 2018 Mar 30;27(1):61–70. doi: 10.7570/jomes.2018.27.1.61 (PMC6489483; doi:10.7570/jomes.2018.27.1.61), 2018-03-30
Supplement: jomes-27-061_suppl.pdf [file jomes-27-061_suppl.pdf]

**Supplementary Table 1.** Baseline characteristics of the study participants by body mass index categories in male

| Variable                        | Body mass index (kg/m <sup>2</sup> ) |                     |                     |                      |                     | P      |
|---------------------------------|--------------------------------------|---------------------|---------------------|----------------------|---------------------|--------|
|                                 | < 18.5 (n=483)                       | 18.5–22.9 (n=7,945) | 23.0–24.9 (n=7,890) | 25.0–29.9 (n=10,906) | ≥ 30.0 (n=916)      |        |
| Age (yr)                        | 59.3±10.8                            | 55.9±9.8            | 54.4±9.2            | 53.4±8.9             | 51.7±8.5            | <0.001 |
| Systolic blood pressure (mmHg)  | 126.8±18.7                           | 130.7±18.6          | 133.3±18.1          | 135.7±17.9           | 139.4±17.9          | <0.001 |
| Diastolic blood pressure (mmHg) | 78.3±11.9                            | 81.0±11.6           | 83.0±11.3           | 85.0±11.4            | 87.3±11.7           | <0.001 |
| Total cholesterol (mg/dL)       | 177.1±41.7                           | 195.0±44.5          | 203.5±46.4          | 207.1±43.5           | 210.9±44.2          | <0.001 |
| Fasting glucose (mg/dL)         | 138.0 (109.0–175.0)                  | 138.0 (112.0–176.0) | 137.0 (112.0–172.0) | 136.0 (114.0–168.0)  | 136.0 (116.0–167.0) | 0.002  |
| Current smoker                  | 291 (60.3)                           | 3,751 (47.2)        | 3,337 (42.3)        | 4,328 (39.7)         | 382 (41.7)          | <0.001 |
| Alcohol drinker                 | 287 (59.4)                           | 4,980 (62.7)        | 5,009 (63.5)        | 7,091 (65.0)         | 573 (62.6)          | 0.003  |
| Low physical activity           | 323 (66.9)                           | 4,235 (53.3)        | 3,729 (47.3)        | 5,121 (47.0)         | 432 (47.2)          | <0.001 |
| Household income                |                                      |                     |                     |                      |                     | <0.001 |
| Upper 30%                       | 143 (29.6)                           | 3,196 (40.2)        | 3,586 (45.5)        | 5,047 (46.3)         | 404 (44.1)          |        |
| Mid 40%                         | 173 (35.8)                           | 2,838 (35.7)        | 2,622 (33.2)        | 3,585 (32.9)         | 302 (33.0)          |        |
| Lower 30%                       | 167 (34.6)                           | 1,911 (24.1)        | 1,682 (21.3)        | 2,274 (20.9)         | 210 (22.9)          |        |
| Use of anti-hypertensive drugs  | 130 (26.9)                           | 2,409 (30.3)        | 2,828 (35.8)        | 4,380 (40.2)         | 454 (49.6)          | <0.001 |
| Use of statin drugs             | 16 (3.3)                             | 510 (6.4)           | 782 (9.9)           | 1,302 (11.9)         | 123 (13.4)          | <0.001 |
| Use of anti-platelet drugs      | 36 (7.5)                             | 753 (9.5)           | 866 (11.0)          | 1,402 (12.9)         | 144 (15.7)          | <0.001 |
| Use of glucose-lowering drugs   |                                      |                     |                     |                      |                     |        |
| Metformin                       | 87 (18.0)                            | 1,795 (22.6)        | 1,869 (23.7)        | 2,511 (23.0)         | 218 (23.8)          | 0.041  |
| Sulfonylurea                    | 149 (30.9)                           | 2,950 (37.1)        | 3,171 (40.2)        | 4,244 (38.9)         | 339 (37.0)          | <0.001 |
| Insulin                         | 50 (10.4)                            | 539 (6.8)           | 427 (5.4)           | 502 (4.6)            | 28 (3.1)            | <0.001 |
| Other glucose-lowering drugs    | 64 (13.3)                            | 1,174 (14.8)        | 1,111 (14.1)        | 1,442 (13.2)         | 114 (12.5)          | 0.023  |

Values are presented as mean ± standard deviation, median (25th–75th percentile), or number (%).

**Supplementary Table 2.** Baseline characteristics of the study participants by body mass index categories in female

| Variable                        | Body mass index (kg/m <sup>2</sup> ) |                     |                     |                     |                     | P      |
|---------------------------------|--------------------------------------|---------------------|---------------------|---------------------|---------------------|--------|
|                                 | < 18.5 (n=295)                       | 18.5–22.9 (n=5,313) | 23.0–24.9 (n=5,100) | 25.0–29.9 (n=8,183) | ≥ 30.0 (n=1,407)    |        |
| Age (yr)                        | 61.9±11.1                            | 58.5±10.3           | 58.3±9.5            | 58.6±9.1            | 57.0±9.1            | <0.001 |
| Systolic blood pressure (mmHg)  | 124.9±20.8                           | 128.4±19.6          | 131.3±19.4          | 134.4±19.2          | 138.5±19.6          | <0.001 |
| Diastolic blood pressure (mmHg) | 76.7±13.4                            | 78.2±11.8           | 79.9±11.6           | 81.9±11.6           | 84.7±11.7           | <0.001 |
| Total cholesterol (mg/dL)       | 197.9±41.6                           | 206.5±49.9          | 212.0±46.8          | 213.6±44.1          | 214.9±45.0          | <0.001 |
| Fasting glucose (mg/dL)         | 130.0 (98.0–167.0)                   | 129.0 (96.0–160.0)  | 127.0 (98.0–154.0)  | 128.0 (100.0–155.0) | 129.0 (103.0–156.0) | 0.320  |
| Current smoker                  | 29 (9.8)                             | 231 (4.4)           | 162 (3.2)           | 259 (3.2)           | 41 (2.9)            | <0.001 |
| Alcohol drinker                 | 29 (9.8)                             | 636 (12.0)          | 626 (12.3)          | 1,066 (13.0)        | 220 (15.6)          | 0.002  |
| Low physical activity           | 226 (76.6)                           | 3,596 (67.7)        | 3,284 (64.4)        | 5,628 (68.8)        | 992 (70.5)          | <0.001 |
| Household income                |                                      |                     |                     |                     |                     | 0.017  |
| Upper 30%                       | 98 (33.2)                            | 1,949 (36.7)        | 1,908 (37.4)        | 2,965 (36.2)        | 456 (32.4)          |        |
| Mid 40%                         | 106 (35.9)                           | 1,779 (33.5)        | 1,670 (32.8)        | 2,809 (34.3)        | 533 (37.9)          |        |
| Lower 30%                       | 91 (30.9)                            | 1,585 (29.8)        | 1,522 (29.8)        | 2,409 (29.4)        | 418 (29.7)          |        |
| Use of anti-hypertensive drugs  | 100 (33.9)                           | 2,132 (40.1)        | 2,471 (48.5)        | 4,570 (55.9)        | 908 (64.5)          | <0.001 |
| Use of statin drugs             | 24 (8.1)                             | 621 (11.7)          | 808 (15.8)          | 1,369 (16.7)        | 250 (17.8)          | <0.001 |
| Use of anti-platelet drugs      | 31 (10.5)                            | 661 (12.4)          | 765 (15.0)          | 1,320 (16.1)        | 255 (18.1)          | <0.001 |
| Use of glucose-lowering drugs   |                                      |                     |                     |                     |                     |        |
| Metformin                       | 56 (19.0)                            | 1,353 (25.5)        | 1,387 (27.2)        | 2,239 (27.4)        | 397 (28.2)          | 0.002  |
| Sulfonylurea                    | 85 (28.8)                            | 2,056 (38.7)        | 2,115 (41.5)        | 3,481 (42.5)        | 633 (45.0)          | <0.001 |
| Insulin                         | 25 (8.5)                             | 392 (7.4)           | 354 (6.9)           | 513 (6.3)           | 75 (5.3)            | 0.014  |
| Other glucose-lowering drugs    | 45 (15.3)                            | 871 (16.4)          | 839 (16.5)          | 1,270 (15.5)        | 224 (15.9)          | 0.572  |

Values are presented as mean ± standard deviation, median (25th–75th percentile), or number (%).

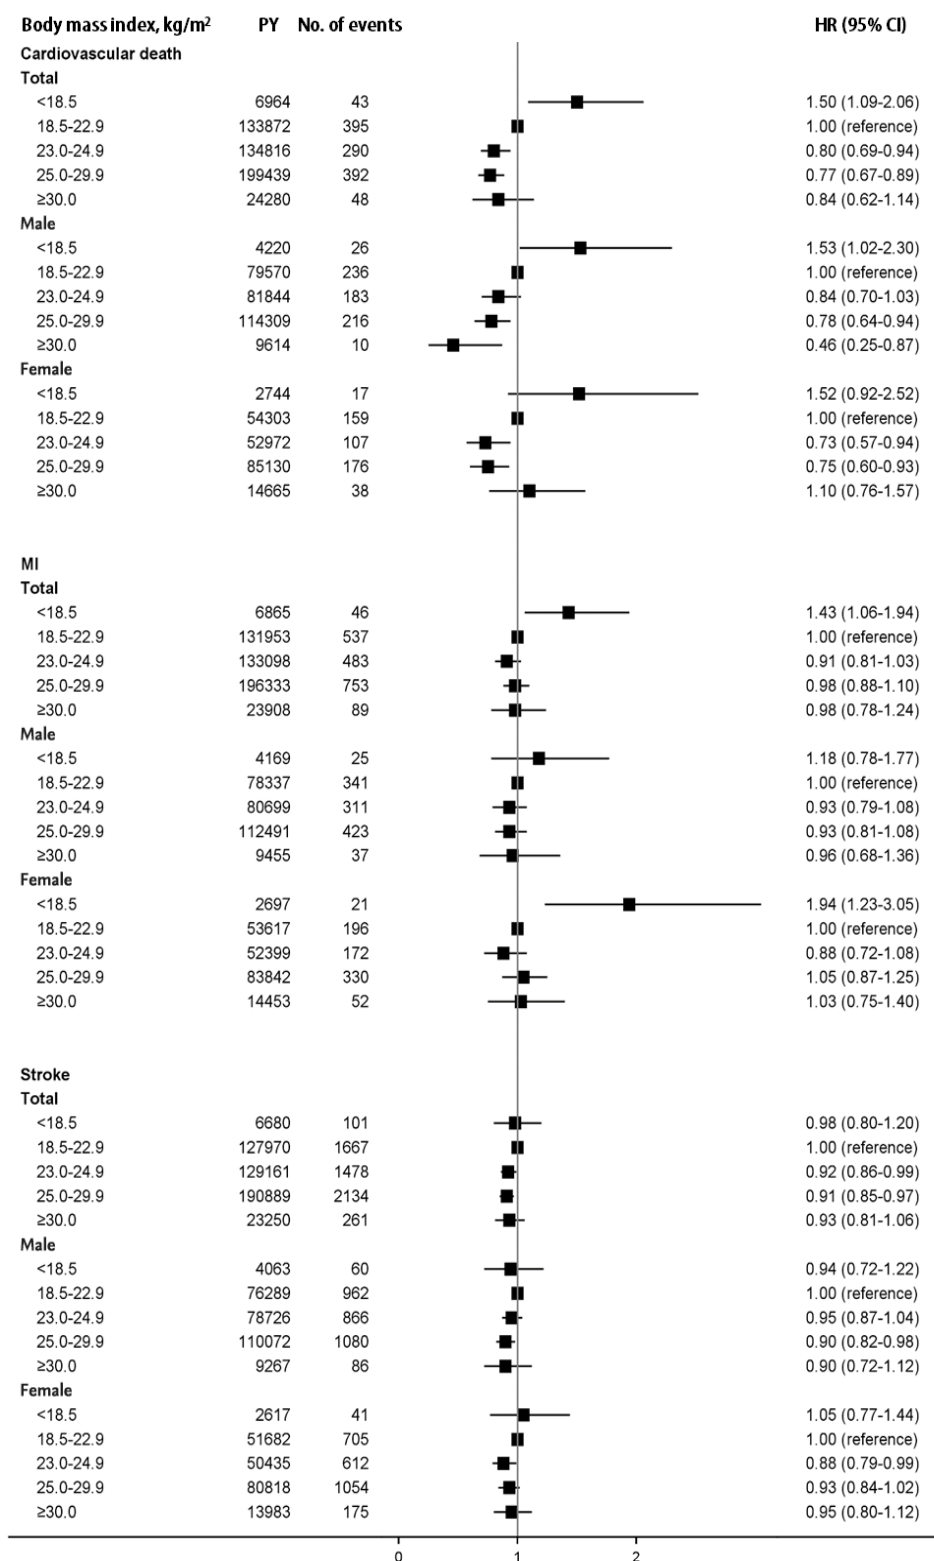

**Supplementary Figure 1.** The association of body mass index categories with subtypes of major adverse cardiovascular events in people with diabetes. Adjusted for sex, age, systolic blood pressure, fasting glucose, total cholesterol, drinking status, smoking status, physical exercise, household income, use of anti-hypertensive drugs, use of statin drugs, use of anti-platelet drugs, and use of glucose-lowering drugs (metformin, sulfonylurea, insulin, and other glucose-lowering drugs). PY, person-years; HR, hazard ratio; CI, confidence interval; MI, myocardial infarction.
